# Supplementary material for: Comorbidities in patients with gout prior to and following diagnosis: case-control study
Source: PubMed Central journal article supplement — Ann Rheum Dis. 2014 Nov 14;75(1):210–7. doi: 10.1136/annrheumdis-2014-206410 (PMC4717388; doi:10.1136/annrheumdis-2014-206410), 2014-11-14
Supplement: annrheumdis-2014-206410-s1.pdf [file annrheumdis-2014-206410-s1.pdf]

## Supplements

### Rationales of comorbidity selection

In this study, we initially choose all 17 categories of Charlson comorbidities in order to calculate the score. However, as the score only encompasses categories chosen to represent one's general health status and to predict mortality, many kinds of comorbidities that might be relevant to gout are missed. Therefore, we went on to select more categories of comorbidities to supplement Charlson comorbidities in order to give a broader picture of comorbidity burden in gout patients. We choose these comorbidities based on the prior knowledge of potential association either by published studies or by our clinical experiences. Sometimes, there is no direct evidence between gout and specific comorbidity but if a link with hyperuricaemia exists, we may also choose to include.

For anaemia, our clinical experience found many gout patients have anaemia due to gastrointestinal bleeding. Later, we found study suggesting potential links between gout and anaemia.[1] There are several studies linking cardiac arrhythmias with hyperuricaemia, but there is no direct evidence linking gout and arrhythmias.[2-4] We include neurological diseases[5] and multiple sclerosis[6] because evidence suggests hyperuricaemia may protect against these disease because antioxidant properties of uric acid. We included depression and psychosis because there is evidence linking uric acid levels to psychiatric disorders.[7-9] Hypothyroidism has been linked to hyperuricaemia because insufficient thyroid hormone may induce reversible renal insufficiency.[10] Direct evidence linking gout and hypothyroidism is lacking. Because of hyperuricaemia, urinary stone risk may be higher in gout but population-based evidence is lacking.[11] Finally we notice several case reports indicating valvular tophi and subsequent valvular disease.[12, 13]

### **Validation of recorded death in CPRD**

In order to validate the recorded death and death date in CPRD, we requested data from the death registration from the Office of National Statistics for all patients registered between 2004 and 2006 who had consented to participate in the linkage scheme, which covered the period between 1st January 1998 and 10th January 2012. Overall, there were 3,522,601 participants from practices who had consented to the linkage scheme in this period. Data on cause of death were only available from these practices. Of these, 209,154 participants were identified as deceased in the CPRD but according to death registration, 197,139 participants had died. As shown in table S1, the sensitivity, specificity, positive predictive value and negative predictive value of a CPRD recorded death were 0.99, 0.99, 0.93 and 1.00, respectively. The CPRD recorded death dates were identical to that recorded in death registration in 89.0% of deceased patients identified by both CPRD and death registration. The difference between recorded dates of death was less than 3 months in 98.5% of deceased patients. Therefore the recording of death and death date in the CPRD is generally consistent with death registration.

Table S1. Performance of CPRD recorded death

| CPRD         | Death registration |              | Total     | PPV   | NPV   |
|--------------|--------------------|--------------|-----------|-------|-------|
|              | recorded           | Not recorded |           |       |       |
| Recorded     | 195,047            | 14,107       | 209,154   | 93.3% |       |
| Not recorded | 2,092              | 3,311,355    | 3,313,447 |       | 99.9% |
| Total        | 197,139            | 3,325,462    | 3,522,601 |       |       |
| Sensitivity  | 98.94%             |              |           |       |       |
| Specificity  |                    | 99.6%        |           |       |       |

Footnote: PPV, positive predictive value; NPV, negative predictive value.

Table S2. Comorbidities present 10 years and 1 year before index date. Figures are number (percentage) of subjects with comorbidity and odds ratios (95% CI).

|                                                       | 10 year period before index date |                |                    |                          | 1 year period before index date |                |                   |                          |
|-------------------------------------------------------|----------------------------------|----------------|--------------------|--------------------------|---------------------------------|----------------|-------------------|--------------------------|
|                                                       | Cases                            | Controls       | Unadjusted OR      | Adjusted OR <sup>a</sup> | Cases                           | Controls       | Unadjusted OR     | Adjusted OR <sup>a</sup> |
| <b>Charlson index<sup>b</sup></b>                     |                                  |                |                    |                          |                                 |                |                   |                          |
| 0                                                     | 24,152 (61.75)                   | 28,171 (72.03) | Reference          | Reference                | 32,061 (81.97)                  | 34,309 (87.72) | Reference         | Reference                |
| 1-2                                                   | 11,359 (29.04)                   | 8,945 (22.87)  | 1.59 (1.53–1.64)*  | 1.39 (1.34–1.45)*        | 6,294 (16.09)                   | 4,409 (11.27)  | 1.59 (1.52–1.66)* | 1.36 (1.30–1.43)*        |
| 3-4                                                   | 2,729 (6.98)                     | 1,604 (4.10)   | 2.21 (2.07–2.37)*  | 1.89 (1.76–2.03)*        | 650 (1.66)                      | 340 (0.87)     | 2.16 (1.89–2.46)* | 1.77 (1.54–2.05)*        |
| ≥5                                                    | 871 (2.23)                       | 391 (1.00)     | 2.97 (2.63–3.37)*  | 2.51 (2.19–2.86)*        | 106 (0.27)                      | 53 (0.14)      | 2.27 (1.63–3.16)* | 1.78 (1.25–2.55)*        |
| <b>Neoplasms</b>                                      |                                  |                |                    |                          |                                 |                |                   |                          |
| Solid malignancy, leukemia and lymphoma               | 2,092 (5.35)                     | 1,758 (4.49)   | 1.21 (1.13–1.29)*  | 1.18 (1.10–1.26)*        | 604 (1.54)                      | 532 (1.36)     | 1.14 (1.01–1.28)* | 1.13 (1.00–1.28)         |
| Metastatic solid tumors                               | 54 (0.14)                        | 64 (0.16)      | 0.84 (0.59–1.21)   | 0.88 (0.59–1.31)         | 25 (0.06)                       | 30 (0.08)      | 0.83 (0.49–1.42)  | 0.89 (0.50–1.59)         |
| <b>Cardiovascular diseases</b>                        |                                  |                |                    |                          |                                 |                |                   |                          |
| Hypertension                                          | 13,615 (34.81)                   | 7,313 (18.70)  | 2.64 (2.54–2.74)*  | 2.07 (1.99–2.16)*        | 5,178 (13.24)                   | 2,652 (6.78)   | 2.26 (2.14–2.38)* | 1.78 (1.69–1.89)*        |
| Cardiac arrhythmias                                   | 3,442 (8.80)                     | 1,455 (3.72)   | 2.65 (2.48–2.84)*  | 2.55 (2.38–2.74)*        | 998 (2.55)                      | 384 (0.98)     | 2.69 (2.38–3.03)* | 2.47 (2.17–2.80)*        |
| Cerebrovascular disease                               | 2,344 (5.99)                     | 1,617 (4.13)   | 1.50 (1.41–1.61)*  | 1.44 (1.34–1.55)*        | 548 (1.40)                      | 368 (0.94)     | 1.51 (1.32–1.72)* | 1.38 (1.19–1.59)*        |
| Congestive heart failure                              | 3,339 (8.54)                     | 919 (2.35)     | 4.49 (4.13–4.87)*  | 4.37 (4.01–4.76)*        | 1,043 (2.67)                    | 259 (0.66)     | 4.31 (3.74–4.96)* | 4.10 (3.53–4.76)*        |
| Myocardial infarction                                 | 2,138 (5.47)                     | 1,079 (2.76)   | 2.06 (1.91–2.23)*  | 1.88 (1.74–2.04)*        | 289 (0.74)                      | 156 (0.40)     | 1.86 (1.53–2.26)* | 1.78 (1.44–2.19)*        |
| Peripheral vascular disease                           | 1,506 (3.85)                     | 922 (2.36)     | 1.69 (1.55–1.84)*  | 1.58 (1.44–1.73)*        | 361 (0.92)                      | 185 (0.47)     | 1.97 (1.65–2.36)* | 1.92 (1.58–2.33)*        |
| Valvular heart disease                                | 888 (2.27)                       | 376 (0.96)     | 2.43 (2.15–2.75)*  | 2.47 (2.17–2.82)*        | 206 (0.53)                      | 79 (0.20)      | 2.69 (2.07–3.51)* | 2.58 (1.94–3.42)*        |
| <b>Genitourinary diseases</b>                         |                                  |                |                    |                          |                                 |                |                   |                          |
| Urolithiasis                                          | 368 (0.94)                       | 256 (0.65)     | 1.44 (1.23–1.69)*  | 1.31 (1.11–1.56)*        | 72 (0.18)                       | 26 (0.07)      | 2.77 (1.77–4.34)* | 2.61 (1.61–4.25)*        |
| Renal diseases                                        | 1,192 (3.05)                     | 212 (0.54)     | 5.98 (5.14–6.95)*  | 5.96 (5.09–6.98)*        | 535 (1.37)                      | 83 (0.21)      | 6.72 (5.31–8.51)* | 6.63 (5.18–8.48)*        |
| <b>Metabolic and endocrine diseases</b>               |                                  |                |                    |                          |                                 |                |                   |                          |
| Uncomplicated diabetes mellitus                       | 2,769 (7.08)                     | 2,279 (5.83)   | 1.24 (1.17–1.32)*  | 0.90 (0.85–0.96)*        | 1,813 (4.64)                    | 1,370 (3.50)   | 1.36 (1.26–1.46)* | 0.98 (0.90–1.06)         |
| Diabetes mellitus with complications                  | 507 (1.30)                       | 442 (1.13)     | 1.15 (1.01–1.31)*  | 0.87 (0.76–1.00)         | 197 (0.50)                      | 170 (0.43)     | 1.16 (0.94–1.43)  | 0.85 (0.68–1.07)         |
| Hyperlipidaemia                                       | 3,955 (10.11)                    | 2,100 (5.37)   | 2.10 (1.98–2.22)*  | 1.71 (1.61–1.82)*        | 996 (2.55)                      | 451 (1.15)     | 2.30 (2.05–2.58)* | 1.91 (1.69–2.16)*        |
| Hypothyroidism                                        | 1,410 (3.61)                     | 874 (2.23)     | 1.68 (1.54–1.83)*  | 1.50 (1.37–1.65)*        | 376 (0.96)                      | 188 (0.48)     | 2.02 (1.69–2.41)* | 1.82 (1.51–2.20)*        |
| <b>Gastrointestinal and hepatic diseases</b>          |                                  |                |                    |                          |                                 |                |                   |                          |
| Peptic ulcer disease                                  | 790 (2.02)                       | 695 (1.78)     | 1.14 (1.03–1.26)*  | 1.10 (0.98–1.23)         | 81 (0.21)                       | 74 (0.19)      | 1.14 (1.03–1.26)  | 1.10 (0.98–1.23)         |
| Mild liver disease                                    | 151 (0.39)                       | 114 (0.29)     | 1.33 (1.04–1.70)*  | 1.13 (0.87–1.47)         | 36 (0.09)                       | 23 (0.06)      | 1.33 (1.04–1.70)* | 1.13 (0.87–1.47)         |
| Moderate to severe liver disease                      | 32 (0.08)                        | 27 (0.07)      | 1.19 (0.71–1.98)   | 1.19 (0.68–2.06)         | 8 (0.02)                        | 4 (0.01)       | 1.19 (0.71–1.98)  | 1.19 (0.68–2.06)         |
| <b>Chronic pulmonary diseases</b>                     | 5,316 (13.59)                    | 3,844 (9.83)   | 1.46 (1.40–1.53)*  | 1.30 (1.23–1.36)*        | 2,393 (6.12)                    | 1,637 (4.19)   | 1.46 (1.40–1.53)* | 1.30 (1.23–1.36)*        |
| <b>Musculoskeletal and connective tissue diseases</b> |                                  |                |                    |                          |                                 |                |                   |                          |
| Osteoarthritis                                        | 4,268 (10.91)                    | 3,049 (7.80)   | 1.51 (1.44–1.59)*  | 1.27 (1.20–1.34)*        | 1,002 (2.56)                    | 656 (1.68)     | 1.55 (1.41–1.72)* | 1.31 (1.17–1.46)*        |
| Rheumatologic disease                                 | 2,786 (7.12)                     | 2,392 (6.12)   | 1.18 (1.12–1.26)*  | 0.94 (0.88–0.99)         | 1,224 (3.13)                    | 995 (2.54)     | 1.25 (1.15–1.36)* | 0.94 (0.85–1.03)         |
| <b>Neurological and mental disorders</b>              |                                  |                |                    |                          |                                 |                |                   |                          |
| Dementia                                              | 117 (0.30)                       | 219 (0.56)     | 0.53 (0.42–0.66)*  | 0.54 (0.42–0.68)*        | 55 (0.14)                       | 92 (0.24)      | 0.59 (0.42–0.83)* | 0.60 (0.42–0.86)*        |
| Hemiplegia                                            | 152 (0.39)                       | 143 (0.37)     | 1.06 (0.85–1.34)   | 1.15 (0.90–1.47)         | 26 (0.07)                       | 22 (0.06)      | 1.18 (0.67–2.09)  | 1.32 (0.72–2.42)         |
| Multiple sclerosis                                    | 30 (0.08)                        | 58 (0.15)      | 0.52 (0.33–0.80)*  | 0.61 (0.38–0.99)*        | 6 (0.02)                        | 19 (0.05)      | 0.32 (0.13–0.79)* | 0.27 (0.10–0.71)*        |
| Other neurological diseases                           | 692 (1.77)                       | 850 (2.17)     | 0.81 (0.73–0.90)*  | 0.83 (0.75–0.93)*        | 175 (0.45)                      | 236 (0.60)     | 0.84 (0.61–0.90)* | 0.75 (0.60–0.91)*        |
| Psychosis                                             | 158 (0.40)                       | 210 (0.54)     | 0.75 (0.61–0.93)*  | 0.71 (0.57–0.89)*        | 38 (0.10)                       | 51 (0.13)      | 0.75 (0.49–1.13)  | 0.63 (0.40–1.19)         |
| Depression                                            | 4,732 (12.10)                    | 4,064 (10.39)  | 1.20 (1.14–1.25)*  | 1.09 (1.04–1.15)*        | 1,200 (3.07)                    | 992 (2.54)     | 1.22 (1.12–1.33)* | 1.11 (1.01–1.22)*        |
| <b>Other comorbidities</b>                            |                                  |                |                    |                          |                                 |                |                   |                          |
| Anaemia                                               | 3,605 (9.22)                     | 2,371 (6.06)   | 1.63 (1.54–1.72)*  | 1.40 (1.32–1.49)*        | 798 (2.04)                      | 396 (1.01)     | 2.06 (1.82–2.33)* | 1.84 (1.61–2.10)*        |
| Psoriasis                                             | 1,253 (3.20)                     | 878 (2.24)     | 1.44 (1.32–1.58)*  | 1.32 (1.20–1.45)*        | 355 (0.91)                      | 206 (0.53)     | 1.72 (1.45–2.05)* | 1.55 (1.29–1.87)*        |
| HIV infection                                         | 12 (0.03)                        | 3 (0.01)       | 4.00 (1.13–14.17)* | 7.06 (1.69–29.51)*       | 3 (0.01)                        | 0              | -                 | -                        |

Footnote: a. adjusted for age, gender, index year, BMI class, smoking status and alcohol consumption. b. Charlson index includes myocardial infarction, congestive heart failure, peripheral vascular disease, cerebrovascular disease, dementia, chronic pulmonary disease, rheumatologic disease, peptic ulcer disease, mild liver disease, moderate or severe liver disease, diabetes mellitus [DM], DM with chronic complications, renal diseases, any malignancy [including leukaemia and lymphoma], metastatic solid tumour and human immunodeficiency virus [HIV] infection. \* p<0.05

Table S3. Cumulative probability of all-cause mortality after diagnosis of gout. Figures are probability of death (percentage).

|                | Incident gout patients |        |         |        |         | Controls     |        |         |        |         | P value |
|----------------|------------------------|--------|---------|--------|---------|--------------|--------|---------|--------|---------|---------|
|                | At diagnosis           | 1 year | 2 years | 5 year | 10 year | At diagnosis | 1 year | 2 years | 5 year | 10 year |         |
| <b>Overall</b> | 0                      | 3.13   | 6.12    | 14.43  | 26.98   | 0            | 2.36   | 4.54    | 11.14  | 21.66   | <0.001  |
| <b>Men</b>     | 0                      | 2.60   | 5.22    | 12.58  | 23.54   | 0            | 2.15   | 4.16    | 10.06  | 19.93   | <0.001  |
| <b>Women</b>   | 0                      | 4.52   | 8.50    | 19.32  | 36.17   | 0            | 2.92   | 5.53    | 13.97  | 26.18   | <0.001  |

Table S4 Predictors for all-cause mortality

| Characteristics                                                                                                                          | Adjusted hazard ratios (95% confidence intervals) |                  |                  |
|------------------------------------------------------------------------------------------------------------------------------------------|---------------------------------------------------|------------------|------------------|
|                                                                                                                                          | All patients                                      | Men              | Women            |
| <b>Model 1: unadjusted</b>                                                                                                               | 1.34 (1.29–1.39)                                  | 1.26 (1.21–1.32) | 1.51 (1.42–1.60) |
| <b>Model 2: adjusted for age, sex, index year, BMI class, smoking status and alcohol consumption</b>                                     | 1.22 (1.17–1.27)                                  | 1.17 (1.11–1.23) | 1.32 (1.23–1.41) |
| <b>Model 3: adjusted for age, sex, index year, BMI class, smoking status and alcohol consumption and all comorbidities at index date</b> | 1.13 (1.08–1.18)                                  | 1.08 (1.02–1.15) | 1.23 (1.14–1.33) |

## Reference

1. McAdams-DeMarco MA, Maynard JW, Coresh J, et al. Anemia and the onset of gout in a population-based cohort of adults: Atherosclerosis Risk in Communities study. *Arthritis Res Ther* 2012;**14**:R193.
2. Chuang SY, Wu CC, Hsu PF, et al. Hyperuricemia and incident atrial fibrillation in a normotensive elderly population in Taiwan. *Nutr Metab Cardiovasc Dis* 2014;**24**:1020-6.
3. Su HM, Lin TH, Hsu PC, et al. Association of hyperuricemia with cardiac events in patients with atrial fibrillation. *Int J Cardiol* 2014;**172**:464-5.
4. Chao TF, Hung CL, Chen SJ, et al. The association between hyperuricemia, left atrial size and new-onset atrial fibrillation. *Int J Cardiol* 2013;**168**:4027-32.
5. Fang P, Li X, Luo JJ, et al. A Double-edged Sword: Uric Acid and Neurological Disorders. *Brain Disord Ther* 2013;**2**:109.
6. Spitsin S, Koprowski H. Role of uric acid in multiple sclerosis. *Curr Top Microbiol Immunol* 2008;**318**:325-42.
7. Kesebir S, Tatlidil Yaylaci E, Suner O, et al. Uric acid levels may be a biological marker for the differentiation of unipolar and bipolar disorder: the role of affective temperament. *J Affect Disord* 2014;**165**:131-4.
8. Kesebir S, Suner O, Yaylaci ET, et al. Increased uric acid levels in bipolar disorder: is it trait or state? *Journal of biological regulators and homeostatic agents J Biol Regul Homeost Agents* 2013;**27**:981-8.
9. Salvadore G, Viale CI, Luckenbaugh DA, et al. Increased uric acid levels in drug-naive subjects with bipolar disorder during a first manic episode. *Prog Neuropsychopharmacol Biol Psychiatry* 2010;**34**:819-21.
10. Mooraki A, Bastani B. Reversible renal insufficiency, hyperuricemia and gouty arthritis in a case of hypothyroidism. *Clin Nephrol* 1998;**49**:59-61.
11. Marchini GS, Sarkissian C, Tian D, et al. Gout, stone composition and urinary stone risk: a matched case comparative study. *J Urol* 2013;**189**:1334-9.
12. Scalapino JN, Edwards WD, Steckelberg JM, et al. Mitral stenosis associated with valvular tophi. *Mayo Clin Proc* 1984;**59**:509-12.
13. Curtiss EI, Miller TR, Shapiro LS. Pulmonic regurgitation due to valvular tophi. *Circulation* 1983;**67**:699-701.
